# Supplementary material for: Design and fabrication of random silver films as substrate for SERS based nano-stress sensing of proteins
Source: Royal Society of Chemistry journal article supplement (doi:10.1039/c3ra44867c), 2014-01-01
Supplement: c3ra44867c.pdf [file c3ra44867c.pdf]

# Supporting Information

## Design and Fabrication of Random Silver Films as substrate for SERS based Nano-Stress sensing of Proteins

Jayakumar Perumal<sup>b, 1</sup>, Kien Voon Kong<sup>b, 1</sup>, U. S. Dinish<sup>b</sup>, Reuben M. Bakker<sup>a,\*</sup>,  
Malini Olivo<sup>b, c, d, \*</sup>

<sup>a</sup> Advanced Concepts and Nanotechnology Division, Data Storage Institute, Agency for Science Technology and Research, DSI building, 5, Engineering Drive 1, Singapore 117608.

<sup>b</sup> Bio-Optical Imaging Group, Singapore Bioimaging Consortium, Agency for Science Technology and Research (A\*STAR), 11 Biopolis Way, #02-02 Helios, Singapore 138667.

<sup>c</sup> Department of Pharmacy, Faculty of Science, National University of Singapore, 18 Science Drive 4, Singapore 117543.

<sup>d</sup> School of Physics, National University Ireland, University Road, Galway, Ireland.

<sup>1</sup> Joint First Authors who contributed equally to this work.

### Grain size distribution data for the Random Silver film:

Grain size distribution data was collected from SEM image using “image J” software program. SEM data of Random Silver film with different mass average thickness from 3 nm to 15 nm were processed to collect the average grain size and also to monitor grain size distribution pattern. All the results were listed in the following slides.

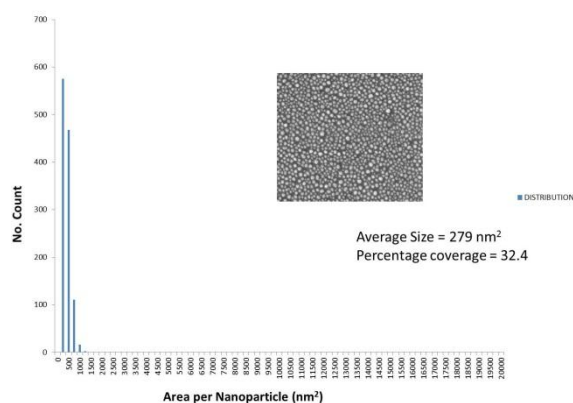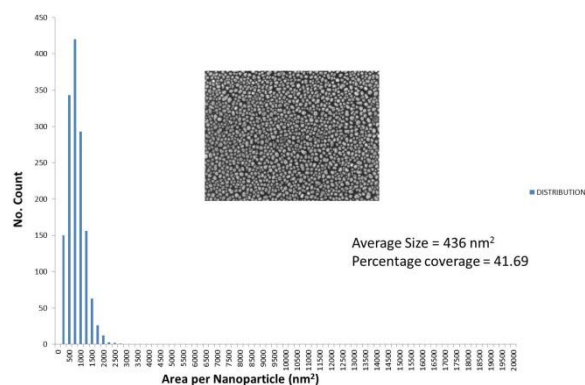

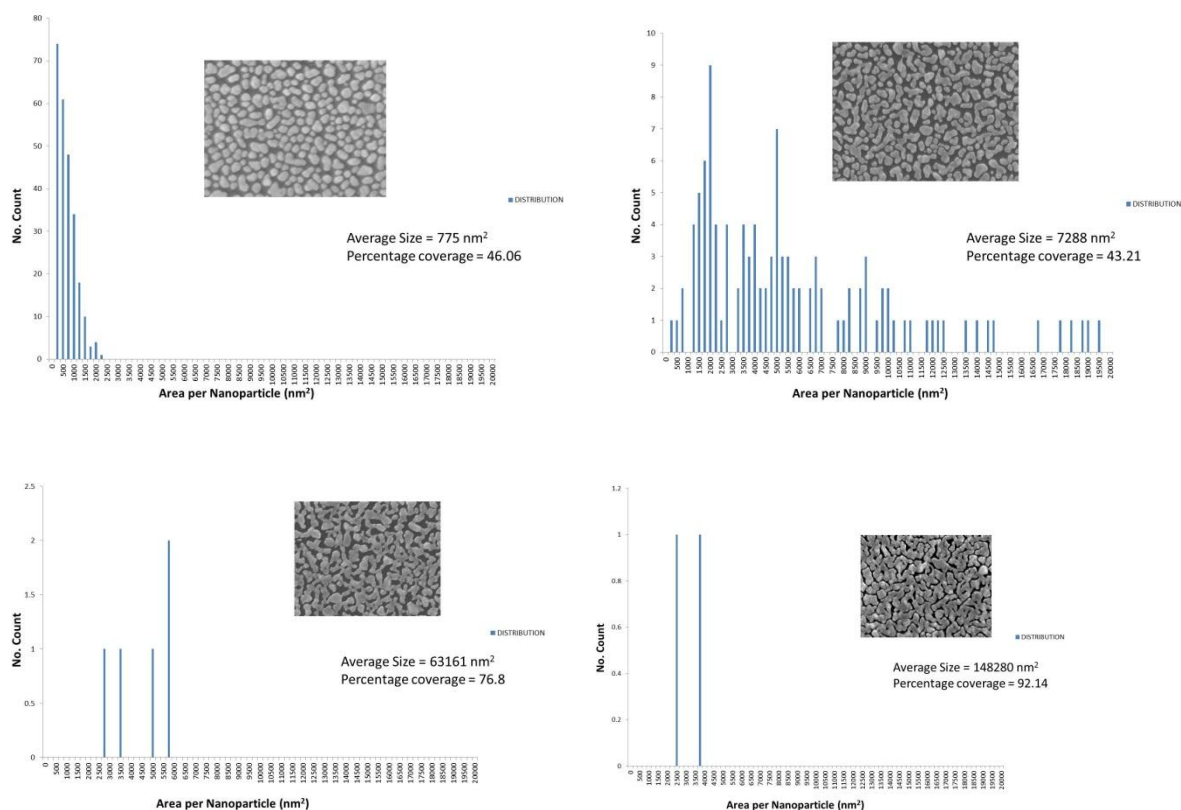

Figure S1. Grain size distribution data was collected from SEM data of random silver film with various mass average thicknesses.

### Calculation of Enhancement Factor:

The spatially-averaged enhancement factor,  $G$ , is determined by using the established method<sup>1</sup> of comparing the 2-Naphthalenethiol (NT) SERS intensity with a thin liquid layer of NT.  $G$  is expressed as

$$G = \left( \frac{I_{SERS}}{N_{SERS}} \right) / \left( \frac{I_{RAMAN}}{N_{BULK}} \right) \quad (1)$$

, where  $I_{Raman}$  and  $I_{SERS}$  are the intensity values at the scattering band of interest, i.e. at  $1066 \text{ cm}^{-1}$ , in bulk liquid Raman spectrum and SERS spectrum respectively.  $N_{Bulk}$  is the number of NT molecules in bulk solution contributing to the unenhanced Raman signal, while  $N_{SERS}$  is the number of NT molecules that are chemisorbed on the substrate and contributes to SERS signal.  $N_{Raman}$  and  $N_{Bulk}$  can be determined using the following equations:

$$N_{SERS} = A_{beam} R \mu \quad (2)$$

$$N_{BULK} = A_{beam} H \rho \quad (3)$$

,where  $A_{beam}$  is the area of laser beam,  $R$  is the area factor and  $\mu$  is the packing density of NT molecules on the surface of substrate.  $H$  is the apparent height of the NT liquid layer emanating Raman signal and  $\rho$  is the molecular density of NT solution prepared.

Substituting Eq. (2) & (3) into Eq. (1),  $G$  can be rewritten as

$$G = \left(\frac{H\rho}{R\mu}\right) \left(\frac{I_{SERS}}{I_{RAMAN}}\right) \quad (4)$$

Table S-1 lists the values of  $I_{Raman}$  and  $I_{SERS}$  of NT at Raman shift  $1066\text{ cm}^{-1}$  measured from different substrates at normalized experimental settings with laser = 785 nm and integration time = 10 s

| Description              | Intensity values $1066\text{cm}^{-1}$ (Counts) |
|--------------------------|------------------------------------------------|
| $I_{Raman}$ of 100mM NT  | 2800                                           |
| $I_{SERS}$ from 7nm SSCF | 29132842                                       |

The  $\mu$  of NT was reported<sup>2,3</sup> to be  $4.01 \times 10^{-10}\text{ mol/cm}^2$ . With our measurement settings,  $H$ , an instrumental parameter, was determined to be  $16\text{ }\mu\text{m}$ . The  $I_{Raman}$  was measured from NT solution prepared at concentration of 100mM, and the corresponding  $\rho$  is  $6.02 \times 10^{19}\text{ molecule/cm}^3$ . Simplifying Eq. 4, we obtain

$$G = \left(\frac{401}{R}\right) \left(\frac{I_{SERS}}{I_{RAMAN}}\right) \quad (5)$$

$R$  is an intrinsic parameter of substrate defining the effective SERS-active area as described in Eq. (6).

$$R = \left( \frac{S_{SERS}}{A_{beam}} \right) \quad (6)$$

, where  $S_{SERS}$  is surface area of SERS-active sites under laser illumination, and  $A_{beam}$  is the area of excitation beam. Using a 50× objective lens, the minimum beam diameter is approximately 1 μm.

We have calculated the R factor based on the assumption that the nanoparticles in the SSCF is of spheroidal form. And one half of the spheroid is involved in the field enhancement. Then  $S_{SERS}$  can be approximated as

$$S_{SERS} = S_{spheroid} \cdot A_{beam} \cdot E_{ex} / A_{spheroid} \quad (7)$$

, where  $E_{ex}$  is the packing efficiency of spheroid which was determined to be ~0.68,  $A_{spheroid}$  is projected area of a Spheroid and  $S_{spheroid}$  is the surface area of a spheroid segment contributing to SERS. It can be defined as follows:

$$S_{spheroid} = 2\pi r_{spheroid} h k \quad (8)$$

, where  $r_{spheroid}$  is the radius of a spheroid and  $h$  is the height of the spheroid,

$$h = 2r_{spheroid} \quad (9)$$

based on our previous assumption,  $k=1/2h$ . Hence the equation 6 can be rewritten as,

$$R = \frac{0.5h}{h} \cdot E_{ex} \quad (10)$$

Hence,  $R$  is determined to be 0.34. Substituting this value into Eq. (5), we obtain

$$G = 1179 \cdot \left( \frac{I_{SERS}}{I_{RAMAN}} \right) \quad (11)$$

Using the intensity values listed in Table S-1, the enhancement factors of SSCF substrates was calculated to be

$$G = 1.23 \times 10^7$$

## Stability of the substrate:

We have examined the shelf-life of 7 nm substrate. To achieve this, we first exposed these substrates to PBS solution for a period of five consecutive days as shown below.

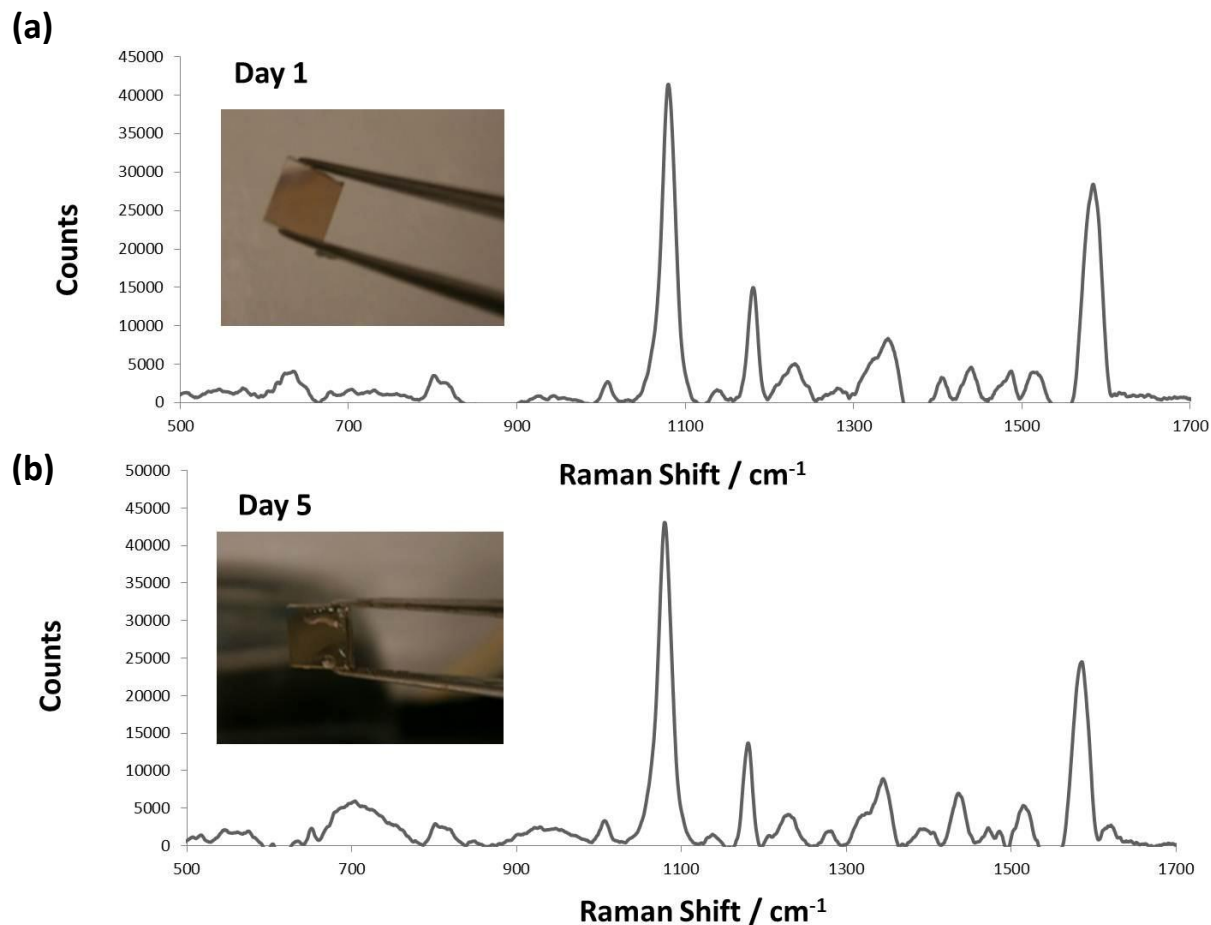

Figure S2. Images and SERS spectra of ATP functionalized Ag substrate (a) after incubation in PBS for 1 day (b) after incubation in PBS for 5 days.

1. W. B. Cai, B. Ren, X. Q. Li, C. X. She, F. M. Liu, X. W. Cai and Z. Q. Tian. *Surface Science*, 1998, **406**, 9-22.
2. R. R. Kolega and J. B. Schlenoff, *Langmuir* 1998, **14**, 5469-5478.
3. C. Y. Fu, K. W. Kho, U. S. Dinish, Z. Y. Koh and M. Olivo, *J. Raman Spectrosc.* 2012, **43**, 977-985.
